# Supplementary material for: Epidemiological Data and Antimicrobial Resistance of Campylobacter spp. in Portugal from 13 Years of Surveillance
Source: MDPI journal article supplement (doi:10.3390/pathogens13020147), 2024-02-06
Supplement: s1 [file s1]

**Table S1.** Distribution (odds ratio and confidence intervals) of a main symptom associated with *Campylobacter* infection by age group.

|            | Bloody diarrhoea |     |                        | Non-bloody Diarrhoea |     |                        | Abdominal pain |      |                        | Fever |      |                        | Vomiting |      |                        |
|------------|------------------|-----|------------------------|----------------------|-----|------------------------|----------------|------|------------------------|-------|------|------------------------|----------|------|------------------------|
|            | Yes              | No  | p-value<br>OR (95%CI)  | Yes                  | No  | p-value<br>OR (95%CI)  | Yes            | No   | p-value<br>OR (95%CI)  | Yes   | No   | p-value<br>OR (95%CI)  | Yes      | No   | p-value<br>OR (95%CI)  |
| <b>Age</b> |                  |     | <0.001                 |                      |     | <0.001                 |                |      | <0.001                 |       |      | <0.001                 |          |      | <0.001                 |
| <1         | 368              | 346 | Ref.                   | 323                  | 390 | Ref.                   | 47             | 666  | Ref.                   | 82    | 633  | Ref.                   | 38       | 677  | Ref.                   |
| 1-4        | 699              | 812 | 0.809<br>(0.677-0.967) | 757                  | 754 | 1.212<br>(1.014-1.449) | 151            | 1360 | 1.573<br>(1.120-2.211) | 206   | 1310 | 1.214<br>(0.924-1.595) | 71       | 1445 | 0.875<br>(0.584-1.312) |
| 5-9        | 198              | 295 | 0.631<br>(0.500-0.796) | 269                  | 224 | 1.450<br>(1.151-1.826) | 85             | 410  | 2.938<br>(2.015-4.283) | 67    | 429  | 1.206<br>(0.854-1.703) | 45       | 451  | 1.778<br>(1.136-2.782) |
| 10-14      | 88               | 176 | 0.470<br>(0.350-0.631) | 143                  | 120 | 1.44<br>(1.083-1.911)  | 63             | 200  | 4.464<br>(2.964-6.722) | 49    | 215  | 1.759<br>(1.196-2.709) | 26       | 238  | 1.946<br>(1.157-3.274) |
| 15-44      | 78               | 269 | 0.273<br>(0.204-0.365) | 200                  | 147 | 1.643<br>(1.268-2.128) | 84             | 264  | 4.509<br>(3.070-6.622) | 69    | 279  | 1.909<br>(1.346-2.274) | 23       | 325  | 1.261<br>(0.739-2.152) |
| 45-64      | 19               | 143 | 0.125<br>(0.076-0.206) | 112                  | 50  | 2.705<br>(1.878-3.894) | 38             | 124  | 4.392<br>(2.718-6.938) | 35    | 128  | 2.111<br>(1.361-3.274) | 13       | 150  | 1.544<br>(0.803-2.970) |
| 65+        | 4                | 164 | 0.023<br>(0.008-1.063) | 137                  | 31  | 5.386<br>(3.517-8.095) | 18             | 150  | 1.7<br>(0.960-3.011)   | 24    | 144  | 1.287<br>(0.789-2.099) | 16       | 152  | 1.875<br>(1.019-3.452) |

**Table S2.** Risk ratio of cases of *Campylobacter* infection (male/female) by age group.

|                 | Age group     |               |               |               |               |               |               |
|-----------------|---------------|---------------|---------------|---------------|---------------|---------------|---------------|
|                 | <1            | 1-4           | 5-9           | 10-14         | 15-44         | 45-64         | 65+           |
| <b>RR</b>       | 0.931         | 1.065         | 1.026         | 1.144         | 0.799         | 0.998         | 0.935         |
| <b>(95% CI)</b> | (0.828-1.047) | (0.992-1.187) | (0.886-1.148) | (0.937-1.397) | (0.684-0.933) | (0.782-1.274) | (0.749-1.167) |
| <b>p-value</b>  | 0.2333        | 0.0802        | 0.7351        | 0.1876        | 0.0045        | 0.988         | 0.5506        |

**Table S3.** Distribution of *Campylobacter* species for paediatric (<15 years old) and adult population by year.

|                       |                  | No. (% within group) |               |               |               |               |               |               |               |               |               |               |               |               |                |
|-----------------------|------------------|----------------------|---------------|---------------|---------------|---------------|---------------|---------------|---------------|---------------|---------------|---------------|---------------|---------------|----------------|
|                       |                  | 2009                 | 2010          | 2011          | 2012          | 2013          | 2014          | 2015          | 2016          | 2017          | 2018          | 2019          | 2020          | 2021          | Overall        |
| Paediatric population | <i>C. jejuni</i> | 75<br>(87.2)         | 185<br>(86.4) | 271<br>(87.4) | 258<br>(89.9) | 350<br>(91.9) | 293<br>(90.4) | 313<br>(87.7) | 383<br>(90.3) | 502<br>(93.1) | 456<br>(92.3) | 200<br>(88.9) | 137<br>(85.6) | 152<br>(86.9) | 3576<br>(89.9) |
|                       | <i>C. coli</i>   | 11<br>(12.8)         | 29<br>(13.6)  | 39<br>(12.6)  | 29<br>(10.1)  | 31<br>(8.1)   | 31<br>(9.6)   | 44<br>(12.3)  | 41<br>(9.7)   | 37<br>(6.9)   | 38<br>(7.7)   | 25<br>(11.1)  | 23<br>(14.4)  | 23<br>(13.1)  | 401<br>(10.1)  |
|                       | <b>Total</b>     | 86                   | 214           | 310           | 287           | 381           | 324           | 357           | 424           | 539           | 494           | 225           | 160           | 175           | 3976           |
| Adult population      | <i>C. jejuni</i> | 15<br>(71.4)         | 19<br>(73.1)  | 28<br>(77.8)  | 35<br>(87.5)  | 37<br>(94.9)  | 73<br>(83.0)  | 76<br>(76.8)  | 89<br>(80.9)  | 120<br>(85.1) | 127<br>(81.9) | 111<br>(79.9) | 84<br>(84.0)  | 126<br>(84.0) | 940<br>(82.2)  |
|                       | <i>C. coli</i>   | 6<br>(28.6)          | 7<br>(26.9)   | 8<br>(22.2)   | 5<br>(12.5)   | 2<br>(5.1)    | 15<br>(17.0)  | 23<br>(23.2)  | 21<br>(19.1)  | 21<br>(14.9)  | 28<br>(18.1)  | 28<br>(20.1)  | 16<br>(16.0)  | 24<br>(16.0)  | 24<br>(16.0)   |
|                       | <b>Total</b>     | 21                   | 26            | 36            | 40            | 39            | 88            | 99            | 110           | 141           | 155           | 139           | 100           | 150           | 1144           |

**Table S4.** Time (in days) elapsed from onset of symptoms to the date of sample collection according to gender and age group.

|                          | <b>Time (days)</b> |                     |
|--------------------------|--------------------|---------------------|
|                          | <b>Mean (SD)</b>   | <b>Median (IQR)</b> |
| <b>Gender</b>            |                    |                     |
| Male                     | 4.52 (6.818)       | 3 (2-5)             |
| Female                   | 5.49 (9.049)       | 4 (2-6)             |
| P                        |                    | 0.014               |
| <b>Age group (years)</b> |                    |                     |
| <1                       | 4.71 (8.099)       | 3 (1-5)             |
| 1-4                      | 5.08 (9.054)       | 4 (2-5)             |
| 5-9                      | 4.50 (5.108)       | 3 (2-5)             |
| 10-14                    | 4.47 (5.574)       | 3.5 (2-5)           |
| 15-44                    | 5.40 (7.128)       | 3 (2-5)             |
| 45-64                    | 5.63 (6.113)       | 3 (3-7.5)           |
| 65+                      | 5.63 (6.927)       | 3 (2-6.25)          |
| P                        |                    | 0.896               |

**Table S5.** Evolution of resistance (%) to different antimicrobial agents for *Campylobacter jejuni* and *Campylobacter coli*.

|                                                   | 2013                           |                          | 2014                            |                          | 2015                            |                          | 2016                            |                          | 2017                            |                          | 2018                        |                          | 2019                            |                          | 2020                            |                          | 2021                            |                          |
|---------------------------------------------------|--------------------------------|--------------------------|---------------------------------|--------------------------|---------------------------------|--------------------------|---------------------------------|--------------------------|---------------------------------|--------------------------|-----------------------------|--------------------------|---------------------------------|--------------------------|---------------------------------|--------------------------|---------------------------------|--------------------------|
| Antibiotic                                        | <i>C.<br/>jejuni</i><br>(n=97) | <i>C. coli</i><br>(n=22) | <i>C.<br/>jejuni</i><br>(n=103) | <i>C. coli</i><br>(n=32) | <i>C.<br/>jejuni</i><br>(n=140) | <i>C. coli</i><br>(n=42) | <i>C.<br/>jejuni</i><br>(n=153) | <i>C. coli</i><br>(n=38) | <i>C.<br/>jejuni</i><br>(n=246) | <i>C. coli</i><br>(n=43) | <i>C. jejuni</i><br>(n=280) | <i>C. coli</i><br>(n=56) | <i>C.<br/>jejuni</i><br>(n=298) | <i>C. coli</i><br>(n=51) | <i>C.<br/>jejuni</i><br>(n=212) | <i>C. coli</i><br>(n=36) | <i>C.<br/>jejuni</i><br>(n=256) | <i>C. coli</i><br>(n=47) |
| <b>Ciprofloxacin<br/>(CIP)</b>                    | 89.7                           | 90.9                     | 98.1                            | 96.9                     | 97.9                            | 100                      | 94.1                            | 100                      | 96.3                            | 97.7                     | 94.6                        | 94.6                     | 93.0                            | 96.1                     | 89.6                            | 88.9                     | 92.1                            | 100                      |
| <b>Erythromycin<br/>(ERY)</b>                     | 4.1                            | 45.5                     | 4.9                             | 43.8                     | 3.6                             | 50.0                     | 3.9                             | 44.7                     | 2.8                             | 53.5                     | 5.4                         | 57.1                     | 2.3                             | 72.5                     | 0.9                             | 36.1                     | 3.2                             | 53.2                     |
| <b>Tetracycline<br/>(TCY)</b>                     | 70.1                           | 86.4                     | 77.7                            | 87.5                     | 82.9                            | 92.9                     | 79.7                            | 92.1                     | 84.1                            | 88.4                     | 82.5                        | 96.4                     | 77.5                            | 98.0                     | 73.6                            | 88.9                     | 79.1                            | 100                      |
| <b>Gentamicin<br/>(GEN)</b>                       | 0                              | 9.1                      | 0                               | 0                        | 0                               | 2.4                      | 0                               | 0                        | 0                               | 2.3                      | 0.4                         | 3.6                      | 0.3                             | 3.9                      | 0                               | 0                        | 0                               | 2.1                      |
| <b>Amoxicillin-<br/>clavulanic acid<br/>(AMC)</b> | -                              | -                        | -                               | -                        | -                               | -                        | -                               | -                        | 0                               | 2.3                      | 1.1                         | 14.3                     | 0                               | 0                        | 0                               | 0                        | 0                               | 0                        |
| <b>Ertapenem<br/>(ETP)</b>                        | -                              | -                        | -                               | -                        | -                               | -                        | -                               | -                        | 0.4                             | 9.3                      | 1.4<br>(4/277)              | 3.6<br>(2/55)            | 0.7                             | 5.9                      | 0.5                             | 5.6                      | 0.4                             | 8.5                      |
| <b>Ampicillin<br/>(AMP)</b>                       | -                              | -                        | -                               | -                        | -                               | -                        | -                               | -                        | -                               | -                        | 79.6<br>(203/264)           | 67.9<br>(36/53)          | 77.2                            | 88.2                     | 66.8                            | 80.6                     | 79.1                            | 85.1                     |

**Table S6.** Univariate logistic regression analysis of the relationship between *Campylobacter jejuni* and *Campylobacter coli* resistance and sociodemographic features.

|                  | Amoxicillin |      |                          | Ampicillin |     |                        | Ciprofloxacin |         |                        | Erythromycin |      |                         | Ertapenem |      |                        | Gentamicin |      |                         | Tetracycline |     |                        |
|------------------|-------------|------|--------------------------|------------|-----|------------------------|---------------|---------|------------------------|--------------|------|-------------------------|-----------|------|------------------------|------------|------|-------------------------|--------------|-----|------------------------|
|                  | R           | S    | P value<br>OR (95%CI)    | R          | S   | P value<br>OR (95%CI)  | R             | S       | P value<br>OR (95%CI)  | R            | S    | P value<br>OR (95%CI)   | R         | S    | P value<br>OR (95%CI)  | R          | S    | P value<br>OR (95%CI)   | R            | S   | P value<br>OR (95%CI)  |
| <b>Gender</b>    |             |      | 0.490                    |            |     | 0.269                  |               |         | 0.704                  |              |      | 0.08                    |           |      | 0.561                  |            |      | 0.320                   |              |     | 0.363                  |
| Female           | 6           | 614  | Ref                      | 372        | 127 | Ref                    | 810           | 48      | Ref                    | 112          | 1185 | Ref                     | 11        | 605  | Ref                    | 6          | 852  | Ref                     | 708          | 150 | Ref                    |
| Male             | 6           | 916  | 0.670<br>(0.215-2.088)   | 568        | 167 | 1.161<br>(0.661-1.121) | 1225          | 78      | 0.931<br>(0.643-1.348) | 138          | 746  | 0.789<br>(0.605-1.029)  | 13        | 909  | 0.787<br>(0.350-1.767) | 5          | 1298 | 0.547<br>(0.166-1.798)  | 1055         | 248 | 0.901<br>(0.720-1.128) |
| <b>Age</b>       |             |      | 0.956                    |            |     | <b>0.040</b>           |               |         | <b>0.001</b>           |              |      | <b>0.034</b>            |           |      | 0.809                  |            |      | 0.994                   |              |     | <b>&lt;0.001</b>       |
| <15              | 8           | 960  | Ref                      | 589        | 160 | Ref                    | 1344          | 63      | Ref.                   | 148          | 1259 | Ref.                    | 16        | 948  | Ref.                   | 7          | 1400 | Ref.                    | 1178         | 229 | Ref.                   |
| 15-44            | 2           | 302  | 0.795<br>(0.168-3.763)   | 184        | 67  | 0.746<br>(0.536-1.037) | 355           | 30      | 0.555<br>(0.354-0.870) | 44           | 341  | 1.098<br>(0.768-1.569)  | 5         | 299  | 0.991<br>(0.360-2.727) | 2          | 383  | 1.044<br>(0.216-5.048)  | 308          | 77  | 0.778<br>(0.584-1.036) |
| 45+              | 2           | 267  | 0.899<br>(0.19-4.258)    | 168        | 67  | 0.681<br>(0.488-0.950) | 337           | 33      | 0.479<br>(0.309-0.342) | 57           | 313  | 1.549<br>(1.114-2.154)  | 3         | 267  | 0-666<br>(0.193-2.302) | 2          | 368  | 1.087<br>(0.225-5.254)  | 278          | 92  | 0.587<br>(0.446-0.773) |
| <b>Species</b>   |             |      | <b>&lt;0.001</b>         |            |     | 0.168                  |               |         | <b>0.046</b>           |              |      | <b>&lt;0.001</b>        |           |      | <b>&lt;0.001</b>       |            |      | <b>&lt;0.001</b>        |              |     | <b>&lt;0.001</b>       |
| <i>C. jejuni</i> | 3           | 1311 | Ref.                     | 794        | 257 | Ref.                   | 1694          | 11      | Ref.                   | 60           | 1747 | Ref.                    | 9         | 1302 | Ref.                   | 2          | 1805 | Ref.                    | 1431         | 376 | Ref.                   |
| <i>C. coli</i>   | 9           | 224  | 17.558<br>(4.717-65.354) | 150        | 37  | 1.312<br>(0.892-1.931) | 354           | 3<br>13 | 1.816<br>(1.012-3.262) | 192          | 175  | 31.945<br>(22.99-44.39) | 15        | 217  | 10.0<br>(4.323-23.14)  | 9          | 358  | 22.689<br>(4.88-105.45) | 342          | 25  | 3.594<br>(2.358-5.48)  |
| <b>Region</b>    |             |      | 0.360                    |            |     | 0.563                  |               |         | 0.195                  |              |      | <b>0.048</b>            |           |      | 0.083                  |            |      | 0.386                   |              |     | 0.241                  |
| North            | 5           | 690  | Ref.                     | 403        | 136 | Ref.                   | 940           | 59      | Ref.                   | 98           | 901  | Ref.                    | 6         | 686  | Ref.                   | 3          | 996  | Ref.                    | 828          | 171 | Ref.                   |
| Center           | 3           | 176  | 2.352<br>(0.557-9.937)   | 112        | 32  | 1.181<br>(0.762-1.831) | 227           | 20      | 0.712<br>(0.420-1.207) | 35           | 212  | 1.518<br>(1.003-2.296)  | 2         | 177  | 1.292<br>(0.259-6.455) | 1          | 246  | 1.350<br>(0.14-13.03)   | 203          | 44  | 0.953<br>(0.661-1.373) |
| Lisbon<br>and TV | 4           | 668  | 0.826<br>(0.221-3.091)   | 428        | 126 | 1.146<br>(0.868-1.514) | 880           | 47      | 1.175<br>(0.792-1.743) | 119          | 808  | 1.354<br>(1.020-1.798)  | 16        | 655  | 2.793<br>(1.086-7.18)  | 7          | 920  | 2.526<br>(0.651-9.798)  | 741          | 186 | 0.823<br>(0.654-1.036) |



**Table S7.** Genomic data (MLST Type and antimicrobial resistance genetic marker) of the *Campylobacter* spp. isolates enrolled in the present study. NA - Not applicable; NF - Not found; MLST – Multi-locus Sequence Type; ENA – European Nucleotide Archive; AMRg - Antimicrobial resistance genetic marker.

| Isolate ID | Species                   | Isolation year | MLST  | ST clonal_complex | Ciprofloxacin AMRg | Tetracycline AMRg | Streptomycin AMRg | Erythromycin AMRg | ENA Accession Number |
|------------|---------------------------|----------------|-------|-------------------|--------------------|-------------------|-------------------|-------------------|----------------------|
| C001       | <i>Campylobacter coli</i> | 2016           | 8104  | ST-828 complex    | T86I               | tet(O)            | NF                | A2075G            | ERR10372370          |
| C002       | <i>Campylobacter coli</i> | 2016           | 828   | ST-828 complex    | T86I               | tet(O)            | aadE-Cc           | A2075G            | ERR10372369          |
| C003       | <i>Campylobacter coli</i> | 2016           | 7345  | ST-828 complex    | T86I               | tet(O)            | NF                | A2075G            | ERR10372306          |
| C004       | <i>Campylobacter coli</i> | 2016           | 9449  | ST-1150 complex   | T86I               | tet(O)            | NF                | A2075G            | ERR10372422          |
| C005       | <i>Campylobacter coli</i> | 2016           | 11397 | ST-828 complex    | T86I               | tet(O)            | aadE-Cc           | A2075G            | ERR10372480          |
| C006       | <i>Campylobacter coli</i> | 2016           | 1585  | ST-828 complex    | T86I               | NF                | aadE-Cc           | A2075G            | ERR10372417          |
| C007       | <i>Campylobacter coli</i> | 2016           | 2177  | ST-828 complex    | T86I               | tet(O)            | NF                | A2075G            | ERR10372410          |
| C008       | <i>Campylobacter coli</i> | 2016           | 3016  | ST-828 complex    | T86I+D90N          | tet(O)            | NF                | A2075G            | ERR10372425          |
| C009       | <i>Campylobacter coli</i> | 2016           | 832   | ST-828 complex    | T86I               | tet(O)            | NF                | A2075G            | ERR10372335          |
| C010       | <i>Campylobacter coli</i> | 2016           | 3016  | ST-828 complex    | T86I               | tet(O)            | NF                | A2075G            | ERR10372340          |
| C011       | <i>Campylobacter coli</i> | 2016           | 899   | ST-828 complex    | T86I               | tet(O)            | NF                | A2075G            | ERR10372359          |
| C012       | <i>Campylobacter coli</i> | 2016           | 11395 | NA                | T86I               | tet(O)            | NF                | A2075G            | ERR10372445          |
| C013       | <i>Campylobacter coli</i> | 2016           | 855   | ST-828 complex    | T86I               | tet(O)            | NF                | A2075G            | ERR10372397          |
| C014       | <i>Campylobacter coli</i> | 2016           | 6820  | ST-1150 complex   | T86I               | tet(W)            | NF                | A2075G            | ERR10372398          |
| C015       | <i>Campylobacter coli</i> | 2016           | 902   | ST-828 complex    | T86I               | tet(O)            | aadE-Cc           | A2075G            | ERR10372401          |
| C016       | <i>Campylobacter coli</i> | 2016           | 8104  | ST-828 complex    | T86I               | tet(O)            | NF                | A2075G            | ERR10372413          |
| C017       | <i>Campylobacter coli</i> | 2016           | 10838 | ST-1150 complex   | T86I               | tet(W)            | NF                | A2075G            | ERR10372429          |
| C018       | <i>Campylobacter coli</i> | 2016           | 3016  | ST-828 complex    | T86I               | tet(O)            | NF                | A2075G            | ERR10372420          |
| C019       | <i>Campylobacter coli</i> | 2016           | 828   | ST-828 complex    | T86I               | tet(O)            | aadE-Cc           | A2075G            | ERR10372433          |
| C020       | <i>Campylobacter coli</i> | 2016           | 1413  | ST-828 complex    | T86I               | tet(O)            | aadE-Cc           | A2075G            | ERR10372408          |
| C021       | <i>Campylobacter coli</i> | 2017           | 10836 | ST-828 complex    | T86I               | tet(O)            | NF                | A2075G            | ERR10372475          |
| C022       | <i>Campylobacter coli</i> | 2017           | 11396 | ST-828 complex    | T86I               | tet(O)            | NF                | A2074N            | ERR10372395          |
| C023       | <i>Campylobacter coli</i> | 2017           | 825   | ST-828 complex    | T86I               | tet(O)            | NF                | A2075G            | ERR10372437          |
| C024       | <i>Campylobacter coli</i> | 2017           | 3016  | ST-828 complex    | T86I               | tet(O)            | NF                | A2075G            | ERR10372461          |
| C025       | <i>Campylobacter coli</i> | 2017           | 832   | ST-828 complex    | T86I               | tet(O)            | NF                | A2075G            | ERR10372447          |



|      |                    |      |       |                |           |        |           |        |             |
|------|--------------------|------|-------|----------------|-----------|--------|-----------|--------|-------------|
| C026 | Campylobacter coli | 2017 | 832   | ST-828 complex | T86I      | tet(O) | NF        | A2075G | ERR10372347 |
| C027 | Campylobacter coli | 2017 | 3016  | ST-828 complex | T86I      | tet(O) | NF        | A2075G | ERR10372470 |
| C028 | Campylobacter coli | 2017 | 3017  | ST-828 complex | T86I      | tet(O) | NF        | A2075G | ERR10372414 |
| C029 | Campylobacter coli | 2017 | 6233  | ST-828 complex | T86I      | tet(O) | NF        | A2074N | ERR10372464 |
| C030 | Campylobacter coli | 2017 | 3017  | ST-828 complex | T86I      | tet(O) | NF        | A2075G | ERR10372348 |
| C031 | Campylobacter coli | 2017 | 3017  | ST-828 complex | T86I      | tet(O) | NF        | A2075G | ERR10372333 |
| C032 | Campylobacter coli | 2017 | 832   | ST-828 complex | T86I      | tet(O) | NF        | A2075G | ERR10372346 |
| C033 | Campylobacter coli | 2017 | 860   | ST-828 complex | T86I      | tet(O) | NF        | A2075G | ERR10372321 |
| C034 | Campylobacter coli | 2017 | 832   | ST-828 complex | T86I      | tet(O) | NF        | A2075G | ERR10372385 |
| C035 | Campylobacter coli | 2017 | 860   | ST-828 complex | T86I      | tet(O) | NF        | A2075G | ERR10372378 |
| C036 | Campylobacter coli | 2017 | 2177  | ST-828 complex | T86I      | tet(O) | NF        | A2075G | ERR10372383 |
| C037 | Campylobacter coli | 2017 | 832   | ST-828 complex | T86I      | tet(O) | NF        | A2075G | ERR10372402 |
| C038 | Campylobacter coli | 2017 | 3017  | ST-828 complex | T86I      | tet(O) | NF        | A2075G | ERR10372419 |
| C039 | Campylobacter coli | 2017 | 3017  | ST-828 complex | T86I      | tet(O) | NF        | A2075G | ERR10372444 |
| C040 | Campylobacter coli | 2017 | 860   | ST-828 complex | T86I      | tet(O) | NF        | A2075G | ERR10372305 |
| C041 | Campylobacter coli | 2017 | 860   | ST-828 complex | T86I      | tet(O) | NF        | A2075G | ERR10372495 |
| C042 | Campylobacter coli | 2017 | 860   | ST-828 complex | T86I      | tet(O) | NF        | A2075G | ERR10372354 |
| C060 | Campylobacter coli | 2018 | 3016  | ST-828 complex | T86I      | tet(O) | NF        | A2075G | ERR10372466 |
| C061 | Campylobacter coli | 2018 | 3016  | ST-828 complex | T86I      | tet(O) | NF        | A2075G | ERR10372357 |
| C062 | Campylobacter coli | 2018 | 9630  | NA             | NF        | NF     | NF        | NF     | ERR10372460 |
| C063 | Campylobacter coli | 2018 | 1239  | NA             | T86I      | tet(O) | NF        | A2075G | ERR10372481 |
| C064 | Campylobacter coli | 2018 | 828   | ST-828 complex | T86I      | tet(O) | aadE-Cc   | A2075G | ERR10372352 |
| C065 | Campylobacter coli | 2018 | 832   | ST-828 complex | T86I      | tet(O) | NF        | A2075G | ERR10372485 |
| C066 | Campylobacter coli | 2018 | 1595  | ST-828 complex | T86I      | tet(O) | ant(6)-Ia | NF     | ERR10372327 |
| C067 | Campylobacter coli | 2018 | 10844 | ST-828 complex | T86I      | tet(O) | NF        | A2075G | ERR10372336 |
| C068 | Campylobacter coli | 2018 | 832   | ST-828 complex | T86I      | tet(O) | NF        | A2075G | ERR10372424 |
| C069 | Campylobacter coli | 2018 | 10844 | ST-828 complex | T86I      | tet(O) | NF        | A2075G | ERR10372318 |
| C070 | Campylobacter coli | 2018 | 832   | ST-828 complex | T86I+D90N | tet(O) | NF        | A2075G | ERR10372454 |
| C071 | Campylobacter coli | 2018 | 8104  | ST-828 complex | T86I      | tet(O) | NF        | A2075G | ERR10372324 |
| C072 | Campylobacter coli | 2018 | 832   | ST-828 complex | T86I      | tet(O) | NF        | A2075G | ERR10372325 |

|      |                    |      |       |                 |           |             |           |        |             |
|------|--------------------|------|-------|-----------------|-----------|-------------|-----------|--------|-------------|
| C073 | Campylobacter coli | 2018 | 3016  | ST-828 complex  | T86I+D90N | tet(O)      | NF        | A2075G | ERR6388529  |
| C074 | Campylobacter coli | 2018 | 10839 | ST-828 complex  | T86I      | tet(O)      | NF        | A2075G | ERR10372446 |
| C075 | Campylobacter coli | 2018 | 832   | ST-828 complex  | T86I      | tet(O)      | NF        | A2075G | ERR10372381 |
| C076 | Campylobacter coli | 2018 | 832   | ST-828 complex  | T86I      | tet(O)      | NF        | A2075G | ERR10372298 |
| C077 | Campylobacter coli | 2018 | 832   | ST-828 complex  | T86I      | tet(O)      | NF        | A2075G | ERR10372448 |
| C078 | Campylobacter coli | 2018 | 832   | ST-828 complex  | T86I      | tet(O)      | NF        | A2075G | ERR10372317 |
| C079 | Campylobacter coli | 2018 | 10838 | ST-1150 complex | T86I      | tet(W)      | NF        | A2075G | ERR10372450 |
| C080 | Campylobacter coli | 2018 | 3016  | ST-828 complex  | T86I      | tet(O)      | NF        | A2075G | ERR10372356 |
| C081 | Campylobacter coli | 2018 | 10832 | NA              | T86I      | tet(O)      | NF        | A2075G | ERR10372492 |
| C082 | Campylobacter coli | 2018 | 832   | ST-828 complex  | T86I      | tet(O)      | NF        | A2075G | ERR10372404 |
| C083 | Campylobacter coli | 2018 | 832   | ST-828 complex  | T86I      | tet(O)      | NF        | A2075G | ERR10372302 |
| C084 | Campylobacter coli | 2018 | 832   | ST-828 complex  | T86I      | tet(O)      | NF        | A2075G | ERR10372407 |
| C085 | Campylobacter coli | 2018 | 10833 | NA              | T86I      | tet(O)      | NF        | A2075G | ERR10372373 |
| C113 | Campylobacter coli | 2019 | 872   | ST-828 complex  | T86I      | tet(O)      | aadE-Cc   | A2075G | ERR10372465 |
| C114 | Campylobacter coli | 2019 | 854   | ST-828 complex  | T86I      | tet(O)      | aadE-Cc   | A2075G | ERR10372376 |
| C115 | Campylobacter coli | 2019 | 854   | ST-828 complex  | T86I      | tet(O)      | aadE-Cc   | A2075G | ERR10372360 |
| C116 | Campylobacter coli | 2019 | 832   | ST-828 complex  | T86I      | tet(O)      | NF        | A2075G | ERR10372316 |
| C117 | Campylobacter coli | 2019 | 860   | ST-828 complex  | T86I      | tet(O)      | NF        | A2075G | ERR10372428 |
| C118 | Campylobacter coli | 2019 | 832   | ST-828 complex  | T86I      | tet(O)      | NF        | A2075G | ERR10372358 |
| C119 | Campylobacter coli | 2019 | 825   | ST-828 complex  | T86I      | tet(O)      | aadE-Cc   | A2075G | ERR10372431 |
| C120 | Campylobacter coli | 2019 | 832   | ST-828 complex  | T86I      | tet(O)      | ant(6)-Ia | A2075G | ERR10372494 |
| C121 | Campylobacter coli | 2019 | 3016  | ST-828 complex  | T86I      | tet(O)      | NF        | A2075G | ERR10372418 |
| C122 | Campylobacter coli | 2019 | 11397 | ST-828 complex  | T86I      | tet(O)      | aadE-Cc   | A2075G | ERR10372365 |
| C123 | Campylobacter coli | 2019 | 8321  | ST-828 complex  | T86I      | tet(O)      | NF        | A2075G | ERR10372498 |
| C124 | Campylobacter coli | 2019 | 3016  | ST-828 complex  | T86I      | tet(O)      | NF        | A2075G | ERR10372396 |
| C125 | Campylobacter coli | 2019 | 832   | ST-828 complex  | T86I      | tet(O)      | NF        | A2075G | ERR10372345 |
| C126 | Campylobacter coli | 2019 | 9987  | ST-828 complex  | T86I      | tet(O)      | aadE-Cc   | A2075G | ERR10372301 |
| C127 | Campylobacter coli | 2019 | 9987  | ST-828 complex  | T86I      | tet(O)      | aadE-Cc   | A2075G | ERR10372488 |
| C128 | Campylobacter coli | 2019 | 832   | ST-828 complex  | T86I      | tet(O)      | NF        | A2075G | ERR10372382 |
| C132 | Campylobacter coli | 2020 | 5659  | ST-828 complex  | T86I      | tet(O/32/O) | NF        | NF     | ERR10372478 |

|      |                      |      |       |                |      |             |                     |        |             |
|------|----------------------|------|-------|----------------|------|-------------|---------------------|--------|-------------|
| C133 | Campylobacter coli   | 2020 | 825   | ST-828 complex | T86I | tet(O)      | aadE-Cc             | NF     | ERR10372399 |
| C134 | Campylobacter coli   | 2020 | 832   | ST-828 complex | T86I | tet(O)      | NF                  | NF     | ERR10372432 |
| C135 | Campylobacter coli   | 2020 | 825   | ST-828 complex | T86I | tet(O)      | aadE-Cc             | A2075G | ERR10372426 |
| C136 | Campylobacter coli   | 2020 | 11414 | NA             | NF   | NF          | NF                  | NF     | ERR10372462 |
| C137 | Campylobacter coli   | 2020 | 1628  | ST-828 complex | T86I | NF          | NF                  | NF     | ERR10372463 |
| C138 | Campylobacter jejuni | 2020 | 11476 | ST-353 complex | T86I | tet(O/32/O) | ant(6)-Ia           | NF     | ERR10372664 |
| C139 | Campylobacter jejuni | 2020 | 904   | ST-607 complex | T86I | tet(O)      | NF                  | NF     | ERR10372597 |
| C140 | Campylobacter jejuni | 2020 | 49    | ST-49 complex  | T86I | NF          | NF                  | NF     | ERR10372602 |
| C141 | Campylobacter jejuni | 2020 | 1701  | ST-45 complex  | NF   | NF          | NF                  | NF     | ERR10372625 |
| C142 | Campylobacter jejuni | 2020 | 8579  | ST-464 complex | T86I | tet(O/32/O) | NF                  | NF     | ERR10372659 |
| C143 | Campylobacter coli   | 2020 | 11469 | ST-828 complex | T86I | tet(O)      | aadE-Cc             | NF     | ERR10372421 |
| C144 | Campylobacter jejuni | 2020 | 22    | ST-22 complex  | NF   | NF          | NF                  | NF     | ERR10372783 |
| C145 | Campylobacter coli   | 2020 | 11467 | ST-828 complex | T86I | tet(O/32/O) | NF                  | NF     | ERR10372367 |
| C146 | Campylobacter coli   | 2020 | 832   | ST-828 complex | T86I | tet(O)      | NF                  | A2075G | ERR10372312 |
| C147 | Campylobacter coli   | 2020 | 10042 | ST-828 complex | T86I | tet(O/32/O) | NF                  | NF     | ERR10372438 |
| C148 | Campylobacter jejuni | 2020 | 49    | ST-49 complex  | T86I | NF          | NF                  | NF     | ERR10372521 |
| C149 | Campylobacter coli   | 2020 | 825   | ST-828 complex | NF   | tet(O)      | aadE-Cc             | NF     | ERR10372332 |
| C151 | Campylobacter coli   | 2020 | 872   | ST-828 complex | T86I | tet(O)      | aadE-Cc             | A2075G | ERR10372322 |
| C152 | Campylobacter coli   | 2020 | 3016  | ST-828 complex | T86I | tet(O)      | NF                  | A2075G | ERR10372366 |
| C153 | Campylobacter coli   | 2020 | 827   | ST-828 complex | NF   | NF          | aadE-Cc             | NF     | ERR10372435 |
| C154 | Campylobacter coli   | 2020 | 832   | ST-828 complex | T86I | tet(O)      | NF                  | A2075G | ERR10372490 |
| C155 | Campylobacter coli   | 2020 | 855   | ST-828 complex | T86I | tet(O)      | NF                  | NF     | ERR10372456 |
| C156 | Campylobacter coli   | 2020 | 1628  | ST-828 complex | T86I | NF          | NF                  | NF     | ERR10372342 |
| C157 | Campylobacter coli   | 2020 | 828   | ST-828 complex | T86I | tet(O)      | aadE-Cc             | A2075G | ERR10372337 |
| C158 | Campylobacter coli   | 2020 | 825   | ST-828 complex | NF   | tet(O)      | aadE-Cc             | NF     | ERR10372501 |
| C159 | Campylobacter coli   | 2020 | 11399 | NA             | T86I | tet(O)      | NF                  | A2075G | ERR10372379 |
| C160 | Campylobacter coli   | 2020 | 1628  | ST-828 complex | T86I | NF          | NF                  | NF     | ERR10372483 |
| C180 | Campylobacter coli   | 2021 | 9987  | ST-828 complex | T86I | tet(O)      | aadE-Cc + ant(6)-Ia | A2075G | ERR10372362 |
| C181 | Campylobacter coli   | 2021 | 6510  | ST-828 complex | T86I | tet(O)      | aadE-Cc             | NF     | ERR10372387 |
| C182 | Campylobacter coli   | 2021 | 11397 | ST-828 complex | T86I | tet(O)      | aadE-Cc             | A2075G | ERR10372394 |

|      |                      |      |       |                |      |             |           |        |             |
|------|----------------------|------|-------|----------------|------|-------------|-----------|--------|-------------|
| C183 | Campylobacter coli   | 2021 | 1595  | ST-828 complex | T86I | tet(O)      | ant(6)-Ia | NF     | ERR10372338 |
| C184 | Campylobacter coli   | 2021 | 1595  | ST-828 complex | T86I | tet(O)      | ant(6)-Ia | NF     | ERR10372328 |
| C185 | Campylobacter coli   | 2021 | 11397 | ST-828 complex | T86I | tet(O)      | aadE-Cc   | A2075G | ERR10372392 |
| C186 | Campylobacter coli   | 2021 | 11397 | ST-828 complex | T86I | tet(O)      | aadE-Cc   | A2075G | ERR10372386 |
| C187 | Campylobacter coli   | 2021 | 10042 | ST-828 complex | T86I | tet(O/32/O) | NF        | A2075G | ERR10372476 |
| C188 | Campylobacter coli   | 2021 | 8195  | ST-828 complex | T86I | tet(O/32/O) | ant(6)-Ia | NF     | ERR10372388 |
| C189 | Campylobacter coli   | 2021 | 10042 | ST-828 complex | T86I | tet(O/32/O) | NF        | A2075G | ERR10372486 |
| C190 | Campylobacter coli   | 2021 | 10042 | ST-828 complex | T86I | tet(O/32/O) | ant(6)-Ia | A2075G | ERR10372441 |
| C191 | Campylobacter coli   | 2021 | 2699  | ST-828 complex | T86I | tet(O)      | aadE-Cc   | A2075G | ERR10372310 |
| C192 | Campylobacter coli   | 2020 | 3017  | ST-828 complex | T86I | tet(O)      | NF        | NF     | ERR10372493 |
| C193 | Campylobacter coli   | 2021 | 828   | ST-828 complex | T86I | tet(O)      | aadE-Cc   | A2075G | ERR10372477 |
| C194 | Campylobacter coli   | 2021 | 8518  | NA             | T86I | tet(O)      | NF        | NF     | ERR10372406 |
| C195 | Campylobacter coli   | 2021 | 10042 | ST-828 complex | T86I | tet(O/32/O) | NF        | NF     | ERR10372452 |
| C196 | Campylobacter coli   | 2021 | 9987  | ST-828 complex | T86I | tet(O)      | aadE-Cc   | A2075G | ERR10372499 |
| C197 | Campylobacter coli   | 2021 | 9987  | ST-828 complex | T86I | tet(O)      | aadE-Cc   | A2075G | ERR10372343 |
| C198 | Campylobacter coli   | 2021 | 11397 | ST-828 complex | T86I | tet(O)      | aadE-Cc   | A2075G | ERR10372311 |
| C199 | Campylobacter coli   | 2021 | 855   | ST-828 complex | T86I | tet(O)      | NF        | NF     | ERR10372350 |
| C200 | Campylobacter jejuni | 2021 | 572   | ST-206 complex | T86I | tet(O/32/O) | ant(6)-Ia | NF     | ERR10372520 |
| C201 | Campylobacter jejuni | 2021 | 6461  | ST-353 complex | T86I | tet(O/32/O) | ant(6)-Ia | NF     | ERR10372706 |
| C202 | Campylobacter jejuni | 2021 | 50    | ST-21 complex  | T86I | NF          | NF        | NF     | ERR10372548 |
| C203 | Campylobacter jejuni | 2021 | 824   | ST-257 complex | T86I | NF          | NF        | NF     | ERR10372721 |
| C204 | Campylobacter jejuni | 2021 | 607   | ST-607 complex | T86I | tet(O)      | NF        | NF     | ERR10372510 |
| C205 | Campylobacter jejuni | 2021 | 122   | ST-206 complex | T86I | NF          | NF        | NF     | ERR10372657 |
| C206 | Campylobacter jejuni | 2021 | 607   | ST-607 complex | T86I | tet(O)      | NF        | NF     | ERR10372661 |
| C207 | Campylobacter jejuni | 2021 | 10846 | ST-353 complex | T86I | tet(O/32/O) | NF        | NF     | ERR10372747 |
| C208 | Campylobacter jejuni | 2021 | 10622 | NA             | T86I | tet(O)      | NF        | A2075G | ERR10372643 |
| C209 | Campylobacter jejuni | 2021 | 354   | ST-354 complex | T86I | tet(O)      | NF        | NF     | ERR10372591 |
| C210 | Campylobacter jejuni | 2021 | 6522  | ST-443 complex | T86I | NF          | NF        | NF     | ERR10372513 |
| C211 | Campylobacter jejuni | 2021 | 354   | ST-354 complex | T86I | tet(O)      | NF        | NF     | ERR10372559 |
| C212 | Campylobacter jejuni | 2021 | 6522  | ST-443 complex | T86I | NF          | NF        | NF     | ERR10372680 |

|      |                      |      |       |                |           |             |           |        |             |
|------|----------------------|------|-------|----------------|-----------|-------------|-----------|--------|-------------|
| C213 | Campylobacter jejuni | 2021 | 6461  | ST-353 complex | T86I      | tet(O/32/O) | ant(6)-Ia | NF     | ERR10372748 |
| C214 | Campylobacter jejuni | 2021 | 10846 | ST-353 complex | T86I      | tet(O/32/O) | NF        | NF     | ERR10372691 |
| C215 | Campylobacter jejuni | 2021 | 2180  | ST-658 complex | T86I      | tet(O)      | NF        | NF     | ERR10372689 |
| C216 | Campylobacter jejuni | 2021 | 49    | ST-49 complex  | T86I      | NF          | NF        | NF     | ERR10372628 |
| C217 | Campylobacter jejuni | 2021 | 50    | ST-21 complex  | T86I      | tet(O)      | NF        | NF     | ERR10372580 |
| C218 | Campylobacter jejuni | 2021 | 7517  | ST-443 complex | T86I      | NF          | NF        | NF     | ERR10372654 |
| C219 | Campylobacter jejuni | 2021 | 1044  | ST-658 complex | T86I      | NF          | NF        | NF     | ERR10372618 |
| C220 | Campylobacter jejuni | 2021 | 2258  | NA             | T86I      | NF          | NF        | NF     | ERR10372761 |
| C221 | Campylobacter jejuni | 2021 | 8579  | ST-464 complex | T86I      | tet(O/32/O) | NF        | NF     | ERR10372694 |
| C222 | Campylobacter jejuni | 2021 | 52    | ST-52 complex  | T86I      | NF          | NF        | NF     | ERR10372718 |
| C223 | Campylobacter jejuni | 2021 | 10846 | ST-353 complex | T86I      | tet(O/32/O) | NF        | NF     | ERR10372633 |
| C224 | Campylobacter jejuni | 2021 | 51    | ST-443 complex | T86I      | tet(O/32/O) | NF        | NF     | ERR10372777 |
| C225 | Campylobacter jejuni | 2021 | 50    | ST-21 complex  | T86I      | NF          | NF        | NF     | ERR10372624 |
| C226 | Campylobacter jejuni | 2021 | 8332  | ST-464 complex | T86I      | tet(O/32/O) | NF        | NF     | ERR10372592 |
| C227 | Campylobacter jejuni | 2021 | 1044  | ST-658 complex | T86I      | NF          | NF        | NF     | ERR10372780 |
| C228 | Campylobacter jejuni | 2021 | 2274  | NA             | T86I      | tet(O)      | NF        | NF     | ERR10372698 |
| C229 | Campylobacter jejuni | 2021 | 9887  | ST-353 complex | T86I      | tet(O)      | NF        | NF     | ERR10372598 |
| C230 | Campylobacter jejuni | 2021 | 7114  | NA             | T86I      | tet(O)      | NF        | NF     | ERR10372699 |
| C231 | Campylobacter jejuni | 2021 | 531   | NA             | T86I      | tet(O)      | NF        | NF     | ERR10372712 |
| C232 | Campylobacter jejuni | 2021 | 9887  | ST-353 complex | T86I      | tet(O)      | NF        | NF     | ERR10372656 |
| C233 | Campylobacter coli   | 2021 | 11473 | NA             | T86I      | tet(O)      | NF        | A2075G | ERR10372459 |
| C234 | Campylobacter jejuni | 2021 | 531   | NA             | T86I      | tet(O)      | NF        | NF     | ERR10372566 |
| C235 | Campylobacter jejuni | 2021 | 356   | ST-353 complex | T86I      | tet(O)      | NF        | NF     | ERR10372655 |
| C236 | Campylobacter coli   | 2021 | 11470 | NA             | T86I      | tet(W)      | NF        | A2075G | ERR10372453 |
| C237 | Campylobacter jejuni | 2021 | 607   | ST-607 complex | T86I      | tet(O)      | NF        | NF     | ERR10372626 |
| C238 | Campylobacter coli   | 2018 | 832   | ST-828 complex | T86I      | tet(O)      | NF        | A2075G | ERR10372361 |
| C239 | Campylobacter coli   | 2017 | 8104  | ST-828 complex | T86I      | tet(O)      | NF        | A2075G | ERR10372479 |
| C244 | Campylobacter coli   | 2019 | 3016  | ST-828 complex | T86I      | tet(O)      | NF        | NF     | ERR10372405 |
| C245 | Campylobacter coli   | 2019 | 2177  | ST-828 complex | T86I+D90N | tet(O)      | NF        | A2075G | ERR10372434 |
| C246 | Campylobacter coli   | 2019 | 832   | ST-828 complex | T86I      | tet(O)      | NF        | A2075G | ERR10372304 |

|      |                      |      |       |                |      |             |         |        |             |
|------|----------------------|------|-------|----------------|------|-------------|---------|--------|-------------|
| C247 | Campylobacter coli   | 2019 | 832   | ST-828 complex | T86I | tet(O)      | NF      | A2075G | ERR10372329 |
| C248 | Campylobacter coli   | 2019 | 832   | ST-828 complex | T86I | tet(O)      | NF      | A2075G | ERR10372491 |
| C249 | Campylobacter coli   | 2021 | 9987  | ST-828 complex | T86I | tet(O)      | aadE-Cc | A2075G | ERR10372353 |
| C001 | Campylobacter jejuni | 2016 | 50    | ST-21 complex  | T86I | NF          | NF      | NF     | ERR10372586 |
| C002 | Campylobacter jejuni | 2016 | 50    | ST-21 complex  | T86I | tet(O)      | NF      | NF     | ERR10372741 |
| C003 | Campylobacter jejuni | 2016 | 11425 | ST-48 complex  | T86I | NF          | NF      | NF     | ERR10372732 |
| C004 | Campylobacter jejuni | 2016 | 2254  | ST-257 complex | T86I | tet(O)      | NF      | NF     | ERR10372525 |
| C005 | Campylobacter jejuni | 2016 | 122   | ST-206 complex | T86I | tet(O/32/O) | NF      | NF     | ERR10372678 |
| C006 | Campylobacter jejuni | 2016 | 990   | ST-257 complex | T86I | tet(O/32/O) | NF      | NF     | ERR10372601 |
| C007 | Campylobacter jejuni | 2016 | 990   | ST-257 complex | T86I | tet(O/32/O) | NF      | NF     | ERR10372692 |
| C008 | Campylobacter jejuni | 2016 | 11427 | ST-607 complex | T86I | tet(O)      | NF      | NF     | ERR10372770 |
| C009 | Campylobacter jejuni | 2016 | 122   | ST-206 complex | T86I | tet(O/32/O) | NF      | NF     | ERR10372526 |
| C010 | Campylobacter jejuni | 2016 | 11428 | ST-21 complex  | T86I | tet(O/32/O) | NF      | NF     | ERR10372634 |
| C011 | Campylobacter jejuni | 2016 | 772   | ST-443 complex | T86I | tet(O)      | NF      | NF     | ERR10372541 |
| C012 | Campylobacter jejuni | 2016 | 49    | ST-49 complex  | T86I | NF          | NF      | NF     | ERR10372700 |
| C013 | Campylobacter jejuni | 2016 | 607   | ST-607 complex | T86I | tet(O)      | NF      | NF     | ERR10372561 |
| C014 | Campylobacter jejuni | 2016 | 904   | ST-607 complex | T86I | tet(O)      | NF      | A2074N | ERR6394672  |
| C015 | Campylobacter jejuni | 2016 | 2036  | ST-353 complex | T86I | tet(O)      | NF      | A2075G | ERR10372511 |
| C016 | Campylobacter jejuni | 2016 | 356   | ST-353 complex | T86I | tet(O)      | NF      | NF     | ERR10372784 |
| C017 | Campylobacter jejuni | 2016 | 10622 | NA             | T86I | tet(O)      | NF      | A2075G | ERR10372740 |
| C018 | Campylobacter jejuni | 2017 | 21    | ST-21 complex  | T86I | tet(O)      | NF      | NF     | ERR10372576 |
| C019 | Campylobacter jejuni | 2017 | 44    | ST-21 complex  | T86I | tet(O)      | NF      | NF     | ERR10372533 |
| C020 | Campylobacter jejuni | 2017 | 990   | ST-257 complex | T86I | tet(O/32/O) | NF      | NF     | ERR10372505 |
| C021 | Campylobacter jejuni | 2017 | 904   | ST-607 complex | T86I | tet(O)      | NF      | NF     | ERR10372767 |
| C022 | Campylobacter jejuni | 2017 | 354   | ST-354 complex | NF   | tet(O)      | NF      | NF     | ERR10372539 |
| C023 | Campylobacter jejuni | 2017 | 1232  | ST-353 complex | T86I | tet(O)      | NF      | NF     | ERR10372792 |
| C024 | Campylobacter jejuni | 2017 | 47    | ST-21 complex  | T86I | tet(O/32/O) | NF      | NF     | ERR10372729 |
| C025 | Campylobacter jejuni | 2017 | 1232  | ST-353 complex | T86I | tet(O)      | NF      | NF     | ERR10372579 |
| C026 | Campylobacter jejuni | 2017 | 607   | ST-607 complex | T86I | tet(O)      | NF      | NF     | ERR10372507 |
| C027 | Campylobacter jejuni | 2017 | 990   | ST-257 complex | T86I | tet(O/32/O) | NF      | NF     | ERR10372751 |

|      |                      |      |       |                |      |             |    |        |             |
|------|----------------------|------|-------|----------------|------|-------------|----|--------|-------------|
| C028 | Campylobacter jejuni | 2017 | 148   | ST-21 complex  | T86I | NF          | NF | NF     | ERR10372762 |
| C029 | Campylobacter jejuni | 2017 | 400   | ST-353 complex | T86I | tet(O/32/O) | NF | NF     | ERR10372519 |
| C030 | Campylobacter jejuni | 2017 | 50    | ST-21 complex  | T86I | NF          | NF | NF     | ERR10372754 |
| C031 | Campylobacter jejuni | 2017 | 11430 | ST-21 complex  | NF   | NF          | NF | NF     | ERR10372616 |
| C032 | Campylobacter jejuni | 2017 | 11434 | ST-21 complex  | T86I | NF          | NF | NF     | ERR10372572 |
| C033 | Campylobacter jejuni | 2017 | 47    | ST-21 complex  | T86I | tet(O/32/O) | NF | NF     | ERR10372515 |
| C034 | Campylobacter jejuni | 2017 | 122   | ST-206 complex | T86I | tet(O/32/O) | NF | NF     | ERR10372516 |
| C035 | Campylobacter jejuni | 2017 | 11436 | ST-21 complex  | T86I | NF          | NF | NF     | ERR10372667 |
| C036 | Campylobacter jejuni | 2017 | 6522  | ST-443 complex | T86I | NF          | NF | NF     | ERR10372757 |
| C037 | Campylobacter jejuni | 2017 | 47    | ST-21 complex  | T86I | tet(O/32/O) | NF | NF     | ERR10372518 |
| C038 | Campylobacter jejuni | 2017 | 443   | ST-443 complex | T86I | tet(O/32/O) | NF | NF     | ERR10372705 |
| C039 | Campylobacter jejuni | 2017 | 52    | ST-52 complex  | T86I | NF          | NF | NF     | ERR10372571 |
| C040 | Campylobacter jejuni | 2017 | 443   | ST-443 complex | T86I | tet(O/32/O) | NF | NF     | ERR10372635 |
| C041 | Campylobacter jejuni | 2017 | 475   | ST-48 complex  | T86I | NF          | NF | NF     | ERR10372538 |
| C042 | Campylobacter jejuni | 2017 | 572   | ST-206 complex | T86I | tet(O)      | NF | NF     | ERR10372758 |
| C043 | Campylobacter jejuni | 2017 | 50    | ST-21 complex  | T86I | NF          | NF | NF     | ERR10372703 |
| C044 | Campylobacter jejuni | 2017 | 10622 | NA             | T86I | tet(O)      | NF | A2075G | ERR10372743 |
| C045 | Campylobacter jejuni | 2017 | 904   | ST-607 complex | T86I | tet(O)      | NF | A2074N | ERR10372508 |
| C046 | Campylobacter jejuni | 2017 | 354   | ST-354 complex | T86I | tet(O)      | NF | NF     | ERR10372503 |
| C047 | Campylobacter jejuni | 2017 | 50    | ST-21 complex  | T86I | tet(O)      | NF | A2075G | ERR10372611 |
| C048 | Campylobacter jejuni | 2018 | 354   | ST-354 complex | T86I | tet(O)      | NF | A2075G | ERR10372645 |
| C049 | Campylobacter jejuni | 2018 | 990   | ST-257 complex | T86I | tet(O/32/O) | NF | NF     | ERR10372504 |
| C050 | Campylobacter jejuni | 2018 | 354   | ST-354 complex | T86I | tet(O)      | NF | A2075G | ERR10372776 |
| C051 | Campylobacter jejuni | 2018 | 572   | ST-206 complex | T86I | tet(O)      | NF | NF     | ERR10372543 |
| C052 | Campylobacter jejuni | 2018 | 8971  | ST-22 complex  | NF   | NF          | NF | NF     | ERR10372794 |
| C053 | Campylobacter jejuni | 2018 | 148   | ST-21 complex  | T86I | NF          | NF | NF     | ERR10372716 |
| C054 | Campylobacter jejuni | 2018 | 11411 | NA             | T86I | tet(O)      | NF | NF     | ERR10372529 |
| C055 | Campylobacter jejuni | 2018 | 904   | ST-607 complex | T86I | tet(O)      | NF | NF     | ERR10372547 |
| C056 | Campylobacter jejuni | 2018 | 572   | ST-206 complex | T86I | tet(O)      | NF | NF     | ERR10372613 |
| C057 | Campylobacter jejuni | 2018 | 52    | ST-52 complex  | T86I | NF          | NF | NF     | ERR10372523 |

|      |                      |      |       |                |      |             |    |        |             |
|------|----------------------|------|-------|----------------|------|-------------|----|--------|-------------|
| C058 | Campylobacter jejuni | 2018 | 46    | ST-206 complex | T86I | tet(O)      | NF | NF     | ERR10372679 |
| C059 | Campylobacter jejuni | 2018 | 44    | ST-21 complex  | T86I | tet(O)      | NF | NF     | ERR10372581 |
| C060 | Campylobacter jejuni | 2018 | 607   | ST-607 complex | T86I | tet(O)      | NF | NF     | ERR10372549 |
| C061 | Campylobacter jejuni | 2018 | 990   | ST-257 complex | T86I | tet(O/32/O) | NF | NF     | ERR10372564 |
| C062 | Campylobacter jejuni | 2018 | 1232  | ST-353 complex | T86I | tet(O)      | NF | NF     | ERR10372512 |
| C063 | Campylobacter jejuni | 2018 | 990   | ST-257 complex | T86I | tet(O/32/O) | NF | NF     | ERR10372568 |
| C064 | Campylobacter jejuni | 2018 | 464   | ST-464 complex | T86I | tet(O/32/O) | NF | NF     | ERR10372707 |
| C065 | Campylobacter jejuni | 2018 | 44    | ST-21 complex  | T86I | tet(O)      | NF | NF     | ERR10372524 |
| C066 | Campylobacter jejuni | 2018 | 44    | ST-21 complex  | T86I | tet(O)      | NF | NF     | ERR10372641 |
| C067 | Campylobacter jejuni | 2018 | 9887  | ST-353 complex | T86I | tet(O)      | NF | NF     | ERR10372558 |
| C068 | Campylobacter jejuni | 2018 | 572   | ST-206 complex | T86I | tet(O)      | NF | NF     | ERR10372738 |
| C069 | Campylobacter jejuni | 2018 | 572   | ST-206 complex | T86I | tet(O)      | NF | NF     | ERR10372514 |
| C070 | Campylobacter jejuni | 2018 | 8579  | ST-464 complex | T86I | tet(O/32/O) | NF | NF     | ERR10372517 |
| C071 | Campylobacter jejuni | 2018 | 52    | ST-52 complex  | T86I | NF          | NF | NF     | ERR10372670 |
| C072 | Campylobacter jejuni | 2018 | 1074  | ST-460 complex | T86I | tet(O)      | NF | NF     | ERR10372584 |
| C073 | Campylobacter jejuni | 2018 | 3769  | ST-21 complex  | T86I | tet(O)      | NF | NF     | ERR10372506 |
| C074 | Campylobacter jejuni | 2018 | 1232  | ST-353 complex | T86I | tet(O)      | NF | NF     | ERR10372717 |
| C075 | Campylobacter jejuni | 2018 | 990   | ST-257 complex | T86I | tet(O/32/O) | NF | NF     | ERR10372725 |
| C076 | Campylobacter jejuni | 2018 | 1044  | ST-658 complex | T86I | NF          | NF | NF     | ERR10372771 |
| C077 | Campylobacter jejuni | 2018 | 8334  | ST-353 complex | T86I | tet(O)      | NF | NF     | ERR10372787 |
| C078 | Campylobacter jejuni | 2018 | 607   | ST-607 complex | T86I | tet(O)      | NF | NF     | ERR10372594 |
| C079 | Campylobacter jejuni | 2018 | 572   | ST-206 complex | T86I | tet(O)      | NF | NF     | ERR10372759 |
| C080 | Campylobacter jejuni | 2018 | 122   | ST-206 complex | T86I | tet(O/32/O) | NF | NF     | ERR10372527 |
| C081 | Campylobacter jejuni | 2018 | 8579  | ST-464 complex | T86I | tet(O/32/O) | NF | NF     | ERR10372701 |
| C082 | Campylobacter jejuni | 2018 | 122   | ST-206 complex | NF   | NF          | NF | NF     | ERR10372567 |
| C083 | Campylobacter jejuni | 2018 | 572   | ST-206 complex | T86I | tet(O)      | NF | NF     | ERR10372531 |
| C084 | Campylobacter jejuni | 2018 | 11442 | ST-257 complex | T86I | tet(O/32/O) | NF | NF     | ERR10372647 |
| C085 | Campylobacter jejuni | 2018 | 11443 | ST-464 complex | T86I | tet(O/32/O) | NF | NF     | ERR10372736 |
| C086 | Campylobacter jejuni | 2018 | 990   | ST-257 complex | T86I | tet(O/32/O) | NF | NF     | ERR10372789 |
| C087 | Campylobacter jejuni | 2018 | 10622 | NA             | T86I | tet(O)      | NF | A2075G | ERR10372674 |



|      |                      |      |       |                |      |             |           |        |             |
|------|----------------------|------|-------|----------------|------|-------------|-----------|--------|-------------|
| C090 | Campylobacter jejuni | 2019 | 607   | ST-607 complex | T86I | tet(O)      | NF        | NF     | ERR10372781 |
| C091 | Campylobacter jejuni | 2019 | 1707  | ST-607 complex | T86I | tet(O/32/O) | NF        | NF     | ERR10372606 |
| C092 | Campylobacter jejuni | 2019 | 122   | ST-206 complex | T86I | NF          | NF        | NF     | ERR10372681 |
| C093 | Campylobacter jejuni | 2019 | 534   | NA             | NF   | NF          | NF        | NF     | ERR10372702 |
| C094 | Campylobacter jejuni | 2019 | 6532  | ST-42 complex  | T86I | tet(O/32/O) | ant(6)-la | NF     | ERR10372765 |
| C095 | Campylobacter jejuni | 2019 | 53    | ST-21 complex  | T86I | tet(O)      | NF        | NF     | ERR10372555 |
| C096 | Campylobacter jejuni | 2019 | 44    | ST-21 complex  | T86I | tet(O)      | NF        | NF     | ERR10372565 |
| C097 | Campylobacter jejuni | 2019 | 990   | ST-257 complex | T86I | tet(O/32/O) | NF        | NF     | ERR10372676 |
| C098 | Campylobacter jejuni | 2019 | 46    | ST-206 complex | T86I | NF          | NF        | NF     | ERR10372537 |
| C099 | Campylobacter jejuni | 2019 | 11446 | ST-21 complex  | T86I | NF          | NF        | NF     | ERR10372693 |
| C100 | Campylobacter jejuni | 2019 | 3769  | ST-21 complex  | T86I | tet(O)      | NF        | NF     | ERR10372713 |
| C101 | Campylobacter jejuni | 2019 | 49    | ST-49 complex  | T86I | NF          | NF        | NF     | ERR10372619 |
| C102 | Campylobacter jejuni | 2019 | 49    | ST-49 complex  | T86I | NF          | NF        | NF     | ERR10372788 |
| C103 | Campylobacter jejuni | 2019 | 607   | ST-607 complex | T86I | tet(O)      | NF        | NF     | ERR10372583 |
| C104 | Campylobacter jejuni | 2019 | 2180  | ST-658 complex | T86I | tet(O)      | NF        | NF     | ERR10372763 |
| C105 | Campylobacter jejuni | 2019 | 859   | ST-443 complex | T86I | tet(O)      | NF        | NF     | ERR10372662 |
| C106 | Campylobacter jejuni | 2019 | 2153  | ST-581 complex | T86I | tet(O)      | NF        | NF     | ERR10372756 |
| C107 | Campylobacter jejuni | 2019 | 1044  | ST-658 complex | T86I | NF          | NF        | NF     | ERR10372769 |
| C108 | Campylobacter jejuni | 2019 | 354   | ST-354 complex | T86I | tet(O)      | NF        | NF     | ERR10372560 |
| C109 | Campylobacter jejuni | 2019 | 2036  | ST-353 complex | T86I | tet(O)      | NF        | A2075G | ERR10372612 |
| C110 | Campylobacter jejuni | 2019 | 2036  | ST-353 complex | T86I | tet(O)      | NF        | A2075G | ERR10372671 |
| C111 | Campylobacter jejuni | 2019 | 607   | ST-607 complex | T86I | tet(O)      | NF        | NF     | ERR10372551 |
| C112 | Campylobacter jejuni | 2019 | 572   | ST-206 complex | T86I | tet(O)      | NF        | NF     | ERR10372631 |
| C113 | Campylobacter jejuni | 2019 | 1044  | ST-658 complex | NF   | NF          | NF        | NF     | ERR10372775 |
| C114 | Campylobacter jejuni | 2019 | 572   | ST-206 complex | T86I | tet(O)      | NF        | NF     | ERR10372632 |
| C115 | Campylobacter jejuni | 2019 | 3769  | ST-21 complex  | T86I | tet(O)      | NF        | NF     | ERR10372528 |
| C116 | Campylobacter jejuni | 2019 | 122   | ST-206 complex | T86I | NF          | NF        | NF     | ERR10372697 |
| C117 | Campylobacter jejuni | 2019 | 122   | ST-206 complex | NF   | NF          | NF        | NF     | ERR10372669 |
| C118 | Campylobacter jejuni | 2019 | 534   | NA             | NF   | NF          | NF        | NF     | ERR10372760 |
| C119 | Campylobacter jejuni | 2019 | 52    | ST-52 complex  | T86I | NF          | NF        | NF     | ERR10372687 |

|      |                      |      |       |                |      |             |           |        |             |
|------|----------------------|------|-------|----------------|------|-------------|-----------|--------|-------------|
| C120 | Campylobacter jejuni | 2019 | 572   | ST-206 complex | T86I | tet(O)      | NF        | NF     | ERR10372556 |
| C131 | Campylobacter jejuni | 2019 | 10622 | NA             | T86I | tet(O)      | NF        | A2075G | ERR10372730 |
| C137 | Campylobacter jejuni | 2020 | 882   | NA             | T86I | tet(O)      | NF        | NF     | ERR10372715 |
| C138 | Campylobacter jejuni | 2020 | 50    | ST-21 complex  | T86I | NF          | NF        | NF     | ERR10372535 |
| C139 | Campylobacter jejuni | 2020 | 8579  | ST-464 complex | T86I | tet(O/32/O) | NF        | NF     | ERR10372621 |
| C140 | Campylobacter jejuni | 2020 | 50    | ST-21 complex  | T86I | NF          | NF        | NF     | ERR10372726 |
| C141 | Campylobacter jejuni | 2020 | 8334  | ST-353 complex | T86I | tet(O)      | NF        | NF     | ERR10372653 |
| C142 | Campylobacter jejuni | 2020 | 7517  | ST-443 complex | T86I | NF          | NF        | NF     | ERR10372711 |
| C143 | Campylobacter jejuni | 2020 | 52    | ST-52 complex  | T86I | NF          | NF        | NF     | ERR10372562 |
| C144 | Campylobacter jejuni | 2020 | 50    | ST-21 complex  | T86I | NF          | NF        | NF     | ERR10372596 |
| C145 | Campylobacter jejuni | 2020 | 990   | ST-257 complex | T86I | tet(O/32/O) | NF        | NF     | ERR10372552 |
| C146 | Campylobacter jejuni | 2020 | 50    | ST-21 complex  | T86I | NF          | NF        | NF     | ERR10372720 |
| C147 | Campylobacter jejuni | 2020 | 122   | ST-206 complex | T86I | tet(O/32/O) | NF        | NF     | ERR10372778 |
| C148 | Campylobacter jejuni | 2020 | 122   | ST-206 complex | T86I | tet(O/32/O) | NF        | NF     | ERR10372724 |
| C149 | Campylobacter jejuni | 2020 | 403   | ST-403 complex | NF   | NF          | NF        | NF     | ERR10372663 |
| C150 | Campylobacter jejuni | 2020 | 354   | ST-354 complex | T86I | tet(O)      | NF        | NF     | ERR10372639 |
| C151 | Campylobacter jejuni | 2020 | 49    | ST-49 complex  | T86I | NF          | NF        | NF     | ERR10372630 |
| C152 | Campylobacter jejuni | 2020 | 6461  | ST-353 complex | T86I | tet(O/32/O) | ant(6)-Ia | NF     | ERR5922431  |
| C153 | Campylobacter jejuni | 2020 | 354   | ST-354 complex | T86I | tet(O)      | NF        | NF     | ERR10372786 |
| C154 | Campylobacter jejuni | 2020 | 354   | ST-354 complex | T86I | tet(O)      | NF        | NF     | ERR10372610 |
| C155 | Campylobacter jejuni | 2020 | 22    | ST-22 complex  | T86I | tet(O)      | NF        | NF     | ERR5922432  |
| C156 | Campylobacter jejuni | 2020 | 122   | ST-206 complex | NF   | NF          | NF        | NF     | ERR10372623 |
| C157 | Campylobacter jejuni | 2020 | 122   | ST-206 complex | T86I | NF          | NF        | NF     | ERR10372672 |
| C158 | Campylobacter jejuni | 2020 | 356   | ST-353 complex | T86I | tet(O)      | NF        | NF     | ERR10372587 |
| C159 | Campylobacter jejuni | 2020 | 1962  | NA             | T86I | NF          | NF        | NF     | ERR10372793 |
| C160 | Campylobacter jejuni | 2020 | 824   | ST-257 complex | NF   | NF          | NF        | NF     | ERR10372709 |
| C161 | Campylobacter jejuni | 2020 | 583   | ST-45 complex  | T86I | NF          | NF        | NF     | ERR10372608 |
| C162 | Campylobacter jejuni | 2020 | 22    | ST-22 complex  | NF   | NF          | NF        | NF     | ERR5922433  |
| C163 | Campylobacter jejuni | 2020 | 583   | ST-45 complex  | NF   | NF          | NF        | NF     | ERR10372627 |
| C164 | Campylobacter jejuni | 2020 | 49    | ST-49 complex  | T86I | NF          | NF        | NF     | ERR10372590 |

|      |                      |      |       |                |      |             |           |        |             |
|------|----------------------|------|-------|----------------|------|-------------|-----------|--------|-------------|
| C165 | Campylobacter jejuni | 2020 | 50    | ST-21 complex  | T86I | NF          | NF        | NF     | ERR10372668 |
| C166 | Campylobacter jejuni | 2020 | 2180  | ST-658 complex | T86I | NF          | NF        | NF     | ERR10372666 |
| C167 | Campylobacter jejuni | 2020 | 45    | ST-45 complex  | NF   | tet(O)      | NF        | NF     | ERR10372563 |
| C168 | Campylobacter jejuni | 2020 | 10622 | NA             | T86I | tet(O)      | NF        | A2075G | ERR10372708 |
| C169 | Campylobacter jejuni | 2020 | 354   | ST-354 complex | T86I | tet(O)      | NF        | NF     | ERR10372554 |
| C170 | Campylobacter jejuni | 2020 | 2153  | ST-581 complex | T86I | tet(O)      | NF        | NF     | ERR10372739 |
| C171 | Campylobacter jejuni | 2020 | 464   | ST-464 complex | T86I | tet(O/32/O) | NF        | NF     | ERR10372675 |
| C172 | Campylobacter jejuni | 2020 | 50    | ST-21 complex  | NF   | tet(O/32/O) | NF        | NF     | ERR10372768 |
| C173 | Campylobacter jejuni | 2020 | 6522  | ST-443 complex | T86I | NF          | NF        | NF     | ERR10372677 |
| C174 | Campylobacter jejuni | 2020 | 8579  | ST-464 complex | T86I | tet(O/32/O) | NF        | NF     | ERR10372683 |
| C175 | Campylobacter jejuni | 2020 | 22    | ST-22 complex  | NF   | NF          | NF        | NF     | ERR5922442  |
| C176 | Campylobacter jejuni | 2020 | 5     | ST-353 complex | T86I | tet(O)      | NF        | NF     | ERR10372578 |
| C177 | Campylobacter jejuni | 2020 | 572   | ST-206 complex | T86I | tet(O/32/O) | ant(6)-la | NF     | ERR10372746 |
| C178 | Campylobacter jejuni | 2020 | 122   | ST-206 complex | T86I | tet(O/32/O) | NF        | NF     | ERR10372648 |
| C179 | Campylobacter jejuni | 2020 | 122   | ST-206 complex | T86I | tet(O/32/O) | NF        | NF     | ERR10372686 |
| C180 | Campylobacter jejuni | 2020 | 50    | ST-21 complex  | T86I | tet(O/32/O) | NF        | NF     | ERR10372753 |
| C210 | Campylobacter jejuni | 2020 | 904   | ST-607 complex | T86I | tet(O)      | NF        | NF     | ERR10372734 |
| C211 | Campylobacter jejuni | 2020 | 122   | ST-206 complex | NF   | NF          | NF        | NF     | ERR10372644 |
| C213 | Campylobacter jejuni | 2021 | 508   | ST-508 complex | NF   | NF          | NF        | NF     | ERR10372682 |
| C214 | Campylobacter jejuni | 2021 | 354   | ST-354 complex | T86I | tet(O)      | NF        | NF     | ERR10372569 |
| C215 | Campylobacter jejuni | 2021 | 6522  | ST-443 complex | T86I | NF          | NF        | NF     | ERR10372534 |
| C216 | Campylobacter jejuni | 2021 | 1044  | ST-658 complex | T86I | NF          | NF        | NF     | ERR10372614 |
| C217 | Campylobacter jejuni | 2021 | 1232  | ST-353 complex | T86I | tet(O)      | NF        | NF     | ERR10372585 |
| C218 | Campylobacter jejuni | 2021 | 990   | ST-257 complex | T86I | tet(O/32/O) | NF        | NF     | ERR10372636 |
| C219 | Campylobacter jejuni | 2021 | 3769  | ST-21 complex  | T86I | tet(O)      | NF        | NF     | ERR10372609 |
| C220 | Campylobacter jejuni | 2021 | 7355  | ST-353 complex | T86I | tet(O/32/O) | ant(6)-la | NF     | ERR10372772 |
| C221 | Campylobacter jejuni | 2021 | 8332  | ST-464 complex | T86I | tet(O/32/O) | NF        | NF     | ERR10372750 |
| C222 | Campylobacter jejuni | 2021 | 11448 | ST-443 complex | T86I | tet(O/32/O) | NF        | NF     | ERR10372577 |
| C223 | Campylobacter jejuni | 2021 | 534   | NA             | NF   | NF          | NF        | NF     | ERR10372544 |
| C224 | Campylobacter jejuni | 2021 | 122   | ST-206 complex | NF   | NF          | NF        | NF     | ERR10372575 |

|      |                      |      |       |                |      |             |           |        |             |
|------|----------------------|------|-------|----------------|------|-------------|-----------|--------|-------------|
| C225 | Campylobacter jejuni | 2021 | 6532  | ST-42 complex  | T86I | tet(O/32/O) | ant(6)-Ia | NF     | ERR10372595 |
| C226 | Campylobacter jejuni | 2021 | 2153  | ST-581 complex | T86I | tet(O)      | NF        | NF     | ERR10372574 |
| C227 | Campylobacter jejuni | 2021 | 11415 | ST-353 complex | T86I | tet(O/32/O) | NF        | NF     | ERR10372774 |
| C228 | Campylobacter jejuni | 2021 | 531   | NA             | T86I | tet(O)      | NF        | NF     | ERR10372522 |
| C229 | Campylobacter jejuni | 2021 | 50    | ST-21 complex  | T86I | NF          | NF        | NF     | ERR10372791 |
| C230 | Campylobacter jejuni | 2021 | 607   | ST-607 complex | T86I | tet(O)      | NF        | NF     | ERR10372688 |
| C231 | Campylobacter jejuni | 2021 | 50    | ST-21 complex  | T86I | NF          | NF        | NF     | ERR10372755 |
| C232 | Campylobacter jejuni | 2021 | 49    | ST-49 complex  | T86I | NF          | NF        | NF     | ERR10372573 |
| C233 | Campylobacter jejuni | 2021 | 918   | ST-48 complex  | NF   | NF          | NF        | NF     | ERR10372540 |
| C234 | Campylobacter jejuni | 2021 | 10846 | ST-353 complex | T86I | tet(O/32/O) | NF        | NF     | ERR10372530 |
| C235 | Campylobacter jejuni | 2021 | 1759  | NA             | T86I | tet(O/32/O) | NF        | NF     | ERR10372735 |
| C236 | Campylobacter jejuni | 2021 | 356   | ST-353 complex | T86I | tet(O)      | NF        | NF     | ERR10372557 |
| C237 | Campylobacter coli   | 2021 | 11397 | ST-828 complex | T86I | tet(O)      | aadE-Cc   | A2075G | ERR10372489 |
| C238 | Campylobacter jejuni | 2021 | 607   | ST-607 complex | T86I | NF          | NF        | NF     | ERR10372696 |
| C239 | Campylobacter jejuni | 2021 | 10622 | NA             | T86I | tet(O)      | NF        | A2075G | ERR10372620 |
| C240 | Campylobacter jejuni | 2021 | 122   | ST-206 complex | T86I | tet(O/32/O) | NF        | NF     | ERR10372737 |
| C241 | Campylobacter jejuni | 2021 | 19    | ST-21 complex  | NF   | tet(O)      | NF        | NF     | ERR10372690 |
| C242 | Campylobacter jejuni | 2021 | 10622 | NA             | T86I | tet(O)      | NF        | A2075G | ERR10372603 |
| C243 | Campylobacter jejuni | 2018 | 1707  | ST-607 complex | T86I | tet(O/32/O) | NF        | NF     | ERR10372723 |
| C244 | Campylobacter jejuni | 2021 | 10622 | NA             | T86I | tet(O)      | NF        | A2075G | ERR10372638 |
| C245 | Campylobacter jejuni | 2021 | 657   | ST-658 complex | NF   | NF          | NF        | NF     | ERR10372785 |
| C246 | Campylobacter jejuni | 2021 | 917   | ST-21 complex  | NF   | NF          | NF        | NF     | ERR10372582 |
| C247 | Campylobacter jejuni | 2021 | 3769  | ST-21 complex  | T86I | tet(O)      | NF        | NF     | ERR10372589 |
| C248 | Campylobacter jejuni | 2021 | 8332  | ST-464 complex | T86I | tet(O/32/O) | NF        | NF     | ERR10372546 |
| C249 | Campylobacter jejuni | 2018 | 859   | ST-443 complex | T86I | tet(O)      | NF        | A2075G | ERR10372509 |
